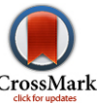

# Perception of Human Papillomavirus Infection, Cervical Cancer and HPV Vaccination in North Indian Population

Showket Hussain<sup>1</sup>, Vilas Nasare<sup>1</sup>, Malasha Kumari<sup>2</sup>, Shashi Sharma<sup>3</sup>, Mohammad Aijaz Khan<sup>4\*</sup>, Bhudev C. Das<sup>5</sup>, Mausumi Bharadwaj<sup>1\*</sup>

**1** Division of Molecular Genetics & Biochemistry, Institute of Cytology & Preventive Oncology (ICMR), Noida, Uttar Pradesh, India, **2** Division of Clinical Oncology, Institute of Cytology & Preventive Oncology (ICMR), Noida, Uttar Pradesh, India, **3** Division of Biostatistics & Epidemiology, Institute of Cytology & Preventive Oncology (ICMR), Noida, Uttar Pradesh, India, **4** Division of Behaviour Oncology, Institute of Cytology & Preventive Oncology (ICMR), Noida, Uttar Pradesh, India, **5** Division of Molecular Oncology, Institute of Cytology & Preventive Oncology (ICMR), Noida, Uttar Pradesh, India

## Abstract

**Background:** Human Papillomavirus (HPV)-associated cervical cancer is the second-most common cancer in women worldwide but it is the most frequent gynaecological cancer and cancer associated death in India women. The objective of this study was to assess knowledge about cervical cancer, HPV, HPV vaccine, HPV vaccine acceptance among school and undergraduates students and their parent's perception about acceptance of HPV vaccine in Northern part of India (Delhi and NCR regions).

**Materials and Methods:** A qualitative questionnaire based survey among 2500 urban/rural students aged 12–22 years was conducted.

**Results:** Overall, a low frequency (15%) of HPV and cervical cancer awareness was observed in students and their parents. However, the awareness was much higher in females belonging to urban setup compared to boys with a perception that HPV causes cervical cancer in women only. Additionally, only (13%) participants who were aware of cervical cancer and HPV) were willing to accept HPV vaccination. Apparently, parents of female students were two times more willing to accept HPV vaccination for their ward than male students ( $p < 0.001$ ; OR 95%CI = 2.09 (1.58–2.76).

**Conclusion:** Cervical cancer and HPV awareness among school, undergraduate students and also to their parents was found to be very low in this part of India. The level of awareness and education appears to be insignificant determinants in rural compared to urban setup. Better health education will be needed to maximize public awareness for cervical cancer prevention.

**Citation:** Hussain S, Nasare V, Kumari M, Sharma S, Khan MA, et al. (2014) Perception of Human Papillomavirus Infection, Cervical Cancer and HPV Vaccination in North Indian Population. PLoS ONE 9(11): e112861. doi:10.1371/journal.pone.0112861

**Editor:** Maria Lina Tornesello, Istituto Nazionale Tumori, Italy

**Received:** September 26, 2013; **Accepted:** October 20, 2014; **Published:** November 11, 2014

**Copyright:** © 2014 Hussain et al. This is an open-access article distributed under the terms of the Creative Commons Attribution License, which permits unrestricted use, distribution, and reproduction in any medium, provided the original author and source are credited.

**Funding:** The authors have no support or funding to report.

**Competing Interests:** The authors have declared that no competing interests exist.

\* Email: bharadwajm@icmr.org.in (MB); madrkh@gmail.com (MAK)

## Introduction

Cancer of the uterine cervix is the second-most common cancer in women worldwide but it is the most common health hazard in India [1]. 80% of sexually active women infected with persistent HPV infection leads invasive cervical cancer [1,2,3]. However, reduction of morbidity/mortality due to cervical cancer is early detection and treatment of cervical precancerous lesions. In developed countries, the mortality has reduced due to introduction of population-based cytological screening programme using Pap test [4]. In addition, screening for cervical infection of HPV has proved to be more effective and reliable [5].

Recently, two HPV vaccines quadrivalent “Gardasil” and bivalent “Cervarix” have been shown to be highly effective in preventing infection with high-risk type HPV16 and HPV18, the two most common oncogenic types. As these vaccines are highly effective before exposure to HPV, current guidelines prioritise adolescent girls as primary target group for HPV vaccination [6].

Though adolescents are the prime candidates for prophylactic HPV vaccination, several studies have shown that adolescents had very little knowledge about HPV vaccination [7,8,9]. The deficiency of such knowledge might adversely affect the vaccine acceptance. Therefore, there has been an exponential increase in the number of studies exploring acceptability of the vaccine since it became commercially available. Many studies have focused on parental willingness to vaccinate their children [1,10,11,12,13,14]. But only few studies have evaluated the knowledge of HPV vaccine, attitudes and intentions of young women [15,16,17,18]. Recent reviews [19,20,21,22] showed that acceptance of the vaccine is high among those who are aware of the relationship between HPV and cervical cancer.

The deficiency of knowledge of causal relationship between HPV and cervical cancer might adversely affect the vaccine acceptance in India. Several studies have been undertaken to evaluate women's awareness and knowledge level about cervical cancer and HPV vaccine [23,24,25]. A report from rural India

**Table 1.** Demographic characteristics of the population studied.

| Characteristics           | No. of Participants (N = 2500) | Percent Distribution (%) |
|---------------------------|--------------------------------|--------------------------|
| <b>Age</b>                |                                |                          |
| 12–15                     | 320                            | 12.8                     |
| 16–18                     | 713                            | 28.52                    |
| 19–22                     | 1467                           | 58.68                    |
| <b>Sex</b>                |                                |                          |
| Female                    | 1570                           | 62.8                     |
| Male                      | 930                            | 37.2                     |
| <b>Education</b>          |                                |                          |
| Standard 6–8              | 286                            | 11.44                    |
| Standard 9–11             | 813                            | 32.52                    |
| Standard 12-undergraduate | 1401                           | 56.04                    |
| <b>Religion</b>           |                                |                          |
| Muslim                    | 786                            | 31.44                    |
| Hindu                     | 1714                           | 68.56                    |

doi:10.1371/journal.pone.0112861.t001

among nursing staff showed that 74% know that pap smear is used for detection of cervical cancer but only 59% know that pap smear can detect both cancerous as well as precancerous lesions of cervix. Surprisingly, only 18% know about HPV vaccine [25].

Preliminary study among 8–17 years old adolescents and their parents in India, suggested that majority of them are unaware of cervical cancer, HPV and HPV vaccines [26]. In view of this, we conducted a study among students from high-school up to undergraduate students to evaluate their knowledge about knowledge of cervical cancer, HPV awareness, willingness of HPV vaccine acceptance among adolescents and their parents and to identify predictors of girls receiving the HPV vaccine.

## Materials and Methods

A pre-designed questionnaire-based survey was conducted and a total of 2600 participants aged between 12–22 years were enumerated from June 2009–June 2011 that included both urban and rural school population of Noida and Delhi. Out of 2600 participants, only 2500 participants completed the questionnaire. The study was approved by Ethics Committee of Institute of Cytology & Preventive Oncology (ICPO/IEC/2008-09/05). Written consent was taken from all participants and guardians in case of minors.

First part of the questionnaire was to collect information on age, sex, study stream, level of study, place of permanent residence, family income, family size and religion etc. were noted. The remaining part a self-administered questionnaire was used for this study, which were to be filled in individually by the participants under the strict vigilance of the teachers/researchers/mentors which serves as invigilators to monitor the influence on answers by the students. The questionnaire contained questions regarding knowledge of cervical cancer, HPV and awareness about HPV vaccine. In addition, there is question on parent's opinion about HPV vaccine acceptance. The questions were developed based on previous established facts for cervical cancer [27,28,29,30]. The most of the questions "yes", "no", or appropriate multiple choices were given as answers. The data from questionnaire were processed anonymously. Furthermore, the data was again

validated by revisiting the same school after one, three and six months of the 1<sup>st</sup> visit to access the knowledge and awareness among participants. Data were analysed using SPSS software version 14.0 to assess the association between demographic factors and HPV awareness and cervical cancer.

## Results

A total of 2600 students participated in the study. Sixty eight (68) participants did not complete the personal information details and thirty two (32) were having incomplete questionnaires. Therefore, a total of 2500 participants could complete the questionnaire, out of which 930 (37.2%) were male and 1570 (62.8%) were female. Most of them 56% were from rural set up where as 44% were of urban region. Most of students 58.7% were in the age group of 19–22 years, 28.5% belonged to 16–18 years, while 12.8% were of age group 12–15 years. The participation rate of female students was higher (62.8%) as compared to male students (37.2%). Two hundred eighty six (11.44%) students were in the education group of 6–8<sup>th</sup> standard, eight hundred thirteen (32.52%) students were of 10–11<sup>th</sup> standard whereas fourteen hundred and one (56.04%) students were of 12<sup>th</sup> standard as well as of undergraduate level respectively. Further stratification of data with respect to religion revealed a higher participation rate of Hindu students (68.56%) which was evident as majority of Hindu population is dominant in these areas whereas 31.44% were of Muslim students. Detailed demographic characteristics of the participants are presented in Table 1.

Table 2, 3 and 4 describes the awareness of the participants.

## Knowledge about cervical cancer

In order to examine the knowledge/awareness about cervical cancer, HPV and HPV vaccines, a short type questions in local as well as in English language were asked to the students and their parents (Table 2). In general, three hundred seventy five (15%) participants were only well aware of cervical cancer. Of these, two hundred fifty seven (69%) female students were aware of cervical cancer whereas 118 (31%) male students knew about cervical cancer. A significant correlation of cervical cancer awareness was

**Table 2.** Awareness about cervical cancer, HPV and HPV vaccine.

| Parameters                                                    | Awareness among participants |            |
|---------------------------------------------------------------|------------------------------|------------|
|                                                               | Frequency                    | Percentage |
| Knowledge about cervical cancer (n = 2500)                    | 375                          | 15         |
| Knowledge about HPV infection causes genital cancer (n = 375) | 275*                         | 73.3       |
| HPV vaccine awareness (n = 275)                               | 225                          | 81.8       |
| HPV vaccine willingness (n = 275)                             | 175**                        | 63.6       |
| Parents opinion about HPV vaccine (n = 2500)                  | 325***                       | 13         |

\*Number indicate participants who had knowledge about cervical cancer and know the causative agent.

\*\*Number indicate participants who had both knowledge and know the causative agent.

\*\*\*General opinion among all participants.

doi:10.1371/journal.pone.0112861.t002

observed with respect to female students ( $p < 0.05$ ) and this could be attributed due to more female participation. Thus, cervical cancer knowledge was apparently more in female participants when compared to male participants ( $p < 0.05$ ,  $OR = 1.35$ ,  $95\%CI = 1.06-1.72$ ) (Table 3). Furthermore, data demonstrate that 235 students (63%) belonged to rural area whereas 140 (37%) were of urban and had a knowledge about cervical cancer. On the other hand, a significant difference was also observed when the comparison was made between rural and urban residence of students. Certainly, a more knowledge about cervical cancer was observed in participants who belonged to urban setup, ( $p < 0.001$ ,  $OR = 1.38$ ;  $95\%CI = 1.10-1.75$ ) (Table 4).

**Knowledge of HPV causes genital cancer**

Of the total participants (375) who had knowledge about cervical cancer, two hundred seventy five (73%) participants were having knowledge that cervical cancer is caused due to HPV infection (Table 2). A significant difference was observed between male: female and rural vs urban participants, as one hundred seventy two (63%) females and one hundred three (37%) males were aware that HPV infection causes genital cancer (Table 3).

**HPV vaccine awareness**

Furthermore, the students were asked to know whether or not they are aware that HPV vaccines are commercially available, two hundred twenty five participants were aware of availability of vaccines. Among them, one hundred sixty two (72%) were female students and sixty three (28%) were male students. Therefore, the correlation of gender of the students with HPV vaccine awareness was observed and found to be statistically significant ( $p = 0.004$ ;  $OR = 1.57$ ,  $95\%CI = 1.14-2.14$ ). Interestingly, vaccine availability

awareness was also attributed to urban population 65% (143/225) (Table 4).

**HPV vaccine willingness**

Students were educated about the risk factors associated with cervical cancer and how it could be prevented through vaccination and other practices, the willingness of HPV vaccination was found to be 70% in females and 64% in urban populations (Table 3 and Table 4).

**Parent’s opinion about HPV vaccine**

Last but not the least, parents opinion was also taken into consideration with respect to vaccine implementation program in North-Indian population. 13% of the parents agreed to vaccinate their wards (Table 2).

**Validation of questionnaire**

After completion of questionnaire by participants, a brief power point presentation was addressed among all subjects which included introduction to cervical cancer, incidence rate both in India and world wide, diagnostic modalities: Pap-test, liquid based cytology (LBC), visual inspection (VIA, VILI), colposcopy etc. and HPV DNA test by hybrid capture 2 (HC2), reverse line blot, real-time PCR etc., prevention and management. In order to evaluate the impact of awareness made available to participants, three times visits (1<sup>st</sup> month, 3<sup>rd</sup> month and 6<sup>th</sup> month) was made to the same school. A semi-structured qualitative interview was conducted to collect the information regarding awareness, knowledge, disease exposome and vaccination programme etc. All the answers were recorded and reviewed. A good awareness response was observed among participants regarding the knowledge and awareness of

**Table 3.** Comparison of awareness among Females and Males.

| Parameters                                                    | Sex         |            | P-value          | Odd ratio (95%CI) |
|---------------------------------------------------------------|-------------|------------|------------------|-------------------|
|                                                               | Female      | Male       |                  |                   |
| Knowledge about cervical cancer (n = 375)                     | 257(68.5%)  | 118(31.5%) | 0.13             | 1.35 (1.06–1.72)  |
| Knowledge about HPV infection causes genital cancer (n = 275) | 172(62.5%)  | 103(37.4%) | 0.93             | 0.99 (0.76–1.29)  |
| HPV vaccine awareness (n = 225)                               | 162(72%)    | 63(28%)    | <b>0.004</b>     | 1.57 (1.14–2.14)  |
| HPV vaccine willingness (n = 175)                             | 123(70.2%)  | 52(29.7%)  | <b>&lt;0.001</b> | 5.2 (3.45–9.01)   |
| Parents opinion about HPV vaccine (n = 325)                   | 248(15.79%) | 77(8.27%)  | <b>&lt;0.001</b> | 2.09 (1.58–2.76)  |

doi:10.1371/journal.pone.0112861.t003

**Table 4.** Awareness about cervical cancer and HPV according to living area.

| Factors                                                       | Knowledge | Living area  |              | P-value | Odd ratio; (95%CI) |
|---------------------------------------------------------------|-----------|--------------|--------------|---------|--------------------|
|                                                               |           | Urban        | Rural        |         |                    |
| Knowledge about cervical cancer (n = 375)                     | Yes       | 235 (62.6)   | 140 (37.3)   | <0.001  | 2.82 (2.07–3.83)   |
| Knowledge about HPV infection causes genital cancer (n = 275) | Yes       | 172 (62.5%)  | 103 (37.45%) | 0.02    | 1.36 (1.04–1.77)   |
| HPV vaccine awareness (n = 225)                               | Yes       | 143 (63.5%)  | 82 (36.45%)  | 0.02    | 1.41 (1.05–1.89)   |
| HPV vaccine willingness (n = 175)                             | Yes       | 113 (64.5%)  | 62 (35.4%)   | 0.02    | 1.47 (1.05–2.05)   |
| Parents opinion about HPV vaccine (n = 325)                   | Yes       | 213 (65.53%) | 112 (34.46%) | <0.001  | 1.58 (1.23–2.04)   |

doi:10.1371/journal.pone.0112861.t004

cervical cancer and HPV. However, a negative response was documented with respect to implementation of vaccination programme in India due to adverse effects of vaccine related deaths recently. Consequently, a negative response which includes anxiety, physico-social distress and high cost of current vaccines was observed. In order to reduce the burden of cervical cancer and perhaps other disease prevalent in India, awareness through print and electronic – mass media is warranted.

## Discussion

As per our knowledge the present study is the first report to evaluate the knowledge of cervical cancer, HPV and HPV vaccine among the high-school and under graduate students in NCR (Noida) and Delhi region of India. It provides the useful information which may help in designing HPV vaccine programs and public health policy making in India. The school/college based studies of HPV awareness are very few and we observed an interesting correlation between increasing age and HPV awareness. Our result is in consistent with the other studies in India that showed low level of cervical cancer and HPV knowledge (15%) in graduate, postgraduate and even in medical students [24,31]. But in contrast, another study from India showed that majority of the participants were well aware (89.6%) of several risk factors of cervical cancer development and its causal relation with HPV because of the study was conducted among medical students [32].

A study from Korea showed a mere 9.5% of female high school and university students had ever heard of HPV [33]. But another study from Mexico among college students, aged 17–25 years, showed that most of the students have heard of HPV, although they had limited knowledge about the causal relation with virus and the preventive strategies [34]. Similarly, another study among college students aged 18–35 years in Ghana noted very low awareness (7.9%) regarding the link between HPV and cervical cancer [35]. Even a study from US showed that 21.5% of the college women have never heard of HPV [36]. Racial differences in HPV knowledge was also reported among US rural ethnic (29% in Blacks and 42% in Whites) populations [37]. Another study reported that 53.3% of the undergraduate female students had heard about cervical cancer and 37.8% knew about HPV in Durban, South Africa [38]. Similarly, another study from Taiwan among 953 undergraduate women aged 17–36 years in five universities in southern Taiwan reported that 70% of undergraduate women had limited knowledge of cervical cancer and 49% were having HPV awareness [39]. Therefore, it was reported that general public has low level of knowledge on HPV infection [20].

Similar to this study, another report from developing countries (India, Peru, Uganda, and Vietnam) showed low level of knowledge of HPV among children, parents, teachers, community leaders, and even health service providers of these four countries [40]. But in contrast, a study among the female educated youths in India, Nepal and Srilanka concluded that the awareness of cervical cancer was 66% in India, 58.8% in Nepal and 57.7% in Srilanka respectively [41]. Another study from Turkey among nursing students (age 16–27 yrs) in tertiary hospital reported that they have theoretical knowledge but not aware that routine gynaecological examination and pap smears can be taken for prevention of cervical cancer [42]. There is a separate study in Polish population among female students (age 18–26 yrs) showed that general knowledge about cervical cancer and their causative agent of HPV is very high but they have poor knowledge about HPV vaccine and cytological screening [43]. But in contrast, a study from Greece among female University and technological institute students (age 18–26 years) reported that 59.1% students are aware of HPV vaccine and this high level of knowledge is positively associated with vaccine uptake [44].

In the present study, the male students were found to be less knowledgeable about HPV than the female students. This indicates that the female students were much aware about the cervical cancer. Similar to our findings, a study among Australian women and men between the ages 18 and 70 years showed that 62.8% of women and only 38.3% of men had heard of HPV [45]. In contrast, the studies from developing countries demonstrated that participants, aged 15–45 years, from both rural and urban settings have a low level of awareness about HPV [46]. Only one study from India among medical students showed that majority (89.6%) of the participants were aware of preventable nature of cervical cancer [32]. It was noticed from the other studies that gender also appears to have influenced knowledge and awareness, especially for HPV to some extent [47,48]. Significant gender differences were observed, with females having better awareness and knowledge than males. Although the data are limited as not all studies reported results separately for males and females, these findings, could be reflective of the way awareness campaigns, for example on HPV, have been targeted more at females than at males.

The results of the present study also showed that Muslim students have very less knowledge as compared to Hindu students. It is important to note that presence of HPV and cervical cancer is relatively much lower in Muslim population. In this regards, the regional differences may be due to cultural, religious, social, ethnic

variation [1]. Our results reflected that the HPV awareness is influenced by age, education, gender and community also.

The present study is also able to determine the parent's opinion about HPV and HPV related information. Our previous study [26] demonstrated that parental literacy has a tremendous influence on the knowledge of cervical cancer (17%) and HPV infection (8%) for their school- aged children in India. In this study we found that knowledge about HPV infection causes genital cancer in male has little more knowledge than the female and in contrast the knowledge about cervical cancer is higher in females than in males. In another study from India reported that 41% participants were aware of a link between sexual activity and cervical cancer [24]. Similarly, a Korean survey [49] showed that 31.5% women aged more than 20 years were aware that sexually transmitted infections (STIs) can cause cervical cancer. But in contrast, few studies from Asian countries also reported of low knowledge levels of public on etiologic involvement of STIs and HPV in cervical cancer development [50,51].

Study demonstrated that the area wise, urban dwellers had higher knowledge about "HPV infection causes genital cancer" than rural belt and similarly we found that knowledge about "cervical cancer" is higher in urban than rural. This study also showed that more attention is needed to educate the rural populations. In this regard, Li et al reported that (51.1%) urban women knew that HPV is related to cervical cancer in compare to their rural counterpart (41.6%). Even fewer (8.1%) knew that it is associated with genital warts with the similar rate of both geographies [52]. Poor knowledge and awareness of cervical cancer among women and other characteristics has been reported from many different geographic regions [35,53,54,55]. This low level knowledge is consistent with the findings from another study of Chinese women in Hong Kong, which reported 10% of women were aware of HPV but had limited specific knowledge of HPV [51]. In some other developed countries with well integrated cervical cancer screening program with the Pap test, such as UK and US, the depth of knowledge about HPV were also reported to be very low [56,57,58]. In contrast, a relatively high rate of HPV awareness (51.2%) was reported from a study from Australia, which may be due to the increased media coverage, particularly in relation to the development of an HPV vaccination program [59]. As lack of knowledge is regarded as one of the major barriers that pose challenges to widespread implementation of HPV vaccine in developing countries [60], increased knowledge of education and health care providers; social workers may help to increase the general knowledge of HPV and HPV related diseases in India.

Our data represents that overall HPV vaccine awareness is very low both in female and male as well as dwellers of rural and urban origin. But in contrast, few studies reported that high vaccine acceptance among parents and adolescents in the general population [11,57,61,62,63,64] found that 84% of participants would accept a free HPV vaccine, whereas 47% were unconcerned about future personal HPV infection risk. Males were less likely to accept a free HPV vaccine and to be concerned about future personal HPV infection risk. Among young women the acceptability of the vaccines is greater if they know that the latter give protection against genital warts [65]. But in most populations,

knowledge of HPV and related vaccines is low but vaccine acceptance is high.

In our study majority of participants was unwilling to be vaccinated due to lack of knowledge of HPV vaccine and its safety which were the major reasons for them. This is consistent with studies from other areas and countries [14,51,66]. Our previous report [26] showed that some parents had diverse opinions that HPV vaccines would make sex safe, leading to freedom for promiscuity and risky sexual behaviour, which is not very common in this region of the globe due to sociocultural factors. They also thought that this would cause social stigmas and tarnish their family's prestige, which has lead to widespread. Therefore, it is extremely important to raise general awareness about HPV, destigmatization of HPV infection and subsequently to gain acceptance for a mass vaccination program for pre-adolescent and adolescent girls in India.

In the present study parents decision between mother (15.8%) and father (8.3%) were very low about HPV vaccine as they are decision maker as vaccination takes place within the family unit, generally by one or both parents. We also observed that father's roles in decision making are also important for finances or critical health events. Although several other studies have examined the preferences for the HPV vaccine among parents [19,60,66,67,68,69] and among girls or young women [8,47,70], but none have compared parental preferences with adolescent preferences.

The strength of our study lies in the selection of study population of both rural and urban set up. But still there is limitation of our study. Findings of the present study could not be generalised to the large Indian population. Hence, an awareness regarding cervical cancer, its prevention and management is warranted.

In conclusion, in order to reduce the burden of cervical cancer and implementation of vaccination program, awareness is required which can be achieved by print and electronic media by raising slogans, conducting free camps in rural sectors for cancer screening and most importantly to sensitize Indian population for vaccine acceptance. Thus, there is a need with immediate effect to educate and aware the young population through print and/ electronic media, NGOs, Hollywood, Bollywood stars and famous sports personalities about ill- myths associated with cervical cancer vaccination program in India.

## Acknowledgments

The authors would like to thank all schools students, teachers and their parents for their support and cooperation. Also anonymous reviewers of this manuscript are greatly acknowledged for their critical comments and suggestions.

## Author Contributions

Conceived and designed the experiments: MB. Contributed reagents/ materials/analysis tools: SH VN. Wrote the paper: SH MAK MB. Supervision of the study: MB. Collection of data: VN MK. Compilation of data: VN. Statistical analysis: SS SH. Interpretation of data: SH. Critical revision of the manuscript: BCD.

## References

1. Das BC, Hussain S, Nasare V, Bharadwaj M (2008) Prospects and prejudices of human papillomavirus vaccines in India. *Vaccine* 26: 2669–2679.
2. Kohaar I, Thakur N, Salhan S, Batra S, Singh V, et al. (2007) TNFalpha-308G/ A polymorphism as a risk factor for HPV associated cervical cancer in Indian population. *Cell Oncol* 29: 249–256.
3. Kohaar I, Hussain S, Thakur N, Tiwari P, Nasare V, et al. (2009) Association between human leukocyte antigen class II alleles and human papillomavirus-mediated cervical cancer in Indian women. *Hum Immunol* 70: 222–229.
4. Wheeler CM (2007) Advances in primary and secondary interventions for cervical cancer: human papillomavirus prophylactic vaccines and testing. *Nat Clin Pract Oncol* 4: 224–235.

5. Sehgal A, Singh V (2009) Human papillomavirus infection (HPV) & screening strategies for cervical cancer. *Indian J Med Res* 130: 234–240.
6. Kim JJ, Ortendahl J, Goldie SJ (2009) Cost-effectiveness of human papillomavirus vaccination and cervical cancer screening in women older than 30 years in the United States. *Ann Intern Med* 151: 538–545.
7. Cates JR, Ortiz R, Shafer A, Romocki LS, Coyne-Beasley T (2012) Designing messages to motivate parents to get their preteenage sons vaccinated against human papillomavirus. *Perspect Sex Reprod Health* 44: 39–47.
8. Caskey R, Lindau ST, Alexander GC (2009) Knowledge and early adoption of the HPV vaccine among girls and young women: results of a national survey. *J Adolesc Health* 45: 453–462.
9. Hilton S, Smith E (2011) “I thought cancer was one of those random things. I didn’t know cancer could be caught...”: adolescent girls’ understandings and experiences of the HPV programme in the UK. *Vaccine* 29: 4409–4415.
10. Bair RM, Mays RM, Sturm LA, Zimet GD (2008) Acceptability of the human papillomavirus vaccine among Latina mothers. *J Pediatr Adolesc Gynecol* 21: 329–334.
11. Lenselink CH, Gerrits MM, Melchers WJ, Massuger LF, van Hamont D, et al. (2008) Parental acceptance of Human Papillomavirus vaccines. *Eur J Obstet Gynecol Reprod Biol* 137: 103–107.
12. Ogilvie GS, Remple VP, Marra F, McNeil SA, Naus M, et al. (2007) Parental intention to have daughters receive the human papillomavirus vaccine. *Cmaj* 177: 1506–1512.
13. Sperber NR, Brewer NT, Smith JS (2008) Influence of parent characteristics and disease outcome framing on HPV vaccine acceptability among rural, Southern women. *Cancer Causes Control* 19: 115–118.
14. Woodhall SC, Lehtinen M, Verho T, Huhtala H, Hokkanen M, et al. (2007) Anticipated acceptance of HPV vaccination at the baseline of implementation: a survey of parental and adolescent knowledge and attitudes in Finland. *J Adolesc Health* 40: 466–469.
15. Crosby R, Schoenberg N, Hopenhayn C, Moore G, Melhan W (2007) Correlates of intent to be vaccinated against human papillomavirus: an exploratory study of college-aged women. *Sex Health* 4: 71–73.
16. D’Urso J, Thompson-Robinson M, Chandler S (2007) HPV knowledge and behaviors of black college students at a historically black university. *J Am Coll Health* 56: 159–163.
17. Gerend MA, Lee SC, Shepherd JE (2007) Predictors of human papillomavirus vaccination acceptance among underserved women. *Sex Transm Dis* 34: 468–471.
18. Gerend MA, Magloire ZF (2008) Awareness, knowledge, and beliefs about human papillomavirus in a racially diverse sample of young adults. *J Adolesc Health* 42: 237–242.
19. Brewer NT, Fazekas KI (2007) Predictors of HPV vaccine acceptability: a theory-informed, systematic review. *Prev Med* 45: 107–114.
20. Klug SJ, Hukelmann M, Blettner M (2008) Knowledge about infection with human papillomavirus: a systematic review. *Prev Med* 46: 87–98.
21. Zimet GD, Liddon N, Rosenthal SL, Lazcano-Ponce E, Allen B (2006) Chapter 24: Psychosocial aspects of vaccine acceptability. *Vaccine* 24 Suppl 3: S3/201–209.
22. Bharadwaj M, Hussain S, Nasare V, Das BC (2009) HPV & HPV vaccination: issues in developing countries. *Indian J Med Res* 130: 327–333.
23. Sankaranarayanan R, Nene BM, Shastri SS, Jayant K, Muwonge R, et al. (2009) HPV screening for cervical cancer in rural India. *N Engl J Med* 360: 1385–1394.
24. Saha A, Chaudhury AN, Bhowmik P, Chatterjee R (2010) Awareness of cervical cancer among female students of premier colleges in Kolkata, India. *Asian Pac J Cancer Prev* 11: 1085–1090.
25. Singh E, Seth S, Rani V, Srivastava DK (2012) Awareness of cervical cancer screening among nursing staff in a tertiary institution of rural India. *J Gynecol Oncol* 23: 141–146.
26. Hussain S, Bharadwaj M, Nasare V, Kumari M, Sharma S, et al. (2012) Human papillomavirus infection among young adolescents in India: impact of vaccination. *J Med Virol* 84: 298–305.
27. Brinton LA (1992) Epidemiology of cervical cancer—overview. *IARC Sci Publ* 3–23.
28. Parazzini F, La Vecchia C, Negri E, Cecchetti G, Fedele L (1989) Reproductive factors and the risk of invasive and intraepithelial cervical neoplasia. *Br J Cancer* 59: 805–809.
29. Holly EA (1996) Cervical intraepithelial neoplasia, cervical cancer, and HPV. *Annu Rev Public Health* 17: 69–84.
30. Brinton LA, Reeves WC, Brenes MM, Herrero R, de Britton RC, et al. (1989) Parity as a risk factor for cervical cancer. *Am J Epidemiol* 130: 486–496.
31. Mehta S, Rajaram S, Goel G, Goel N (2013) Awareness about Human Papilloma Virus and its Vaccine Among Medical Students. *Indian J Community Med* 38: 92–94.
32. Pandey D, Vanya V, Bhagat S, Vs B, Shetty J (2012) Awareness and attitude towards human papillomavirus (HPV) vaccine among medical students in a premier medical school in India. *PLoS One* 7: e40619.
33. Han YJL, Kang SR, Kim EJ, Kim MK, Kim NH, et al. (2007) Knowledge regarding cervical cancer, human Papillomavirus and future acceptance of vaccination among girls in their late teens in Korea. *Korean J Obstet Gynecol* 50: 1090–1099.
34. Vogtmann E, Harlow SD, Valdez AC, Valdez JC, Ponce EL (2011) HPV knowledge in Mexican college students: implications for intervention programmes. *Health Soc Care Community* 19: 148–157.
35. Abotchie PN, Shokar NK (2009) Cervical cancer screening among college students in Ghana: knowledge and health beliefs. *Int J Gynecol Cancer* 19: 412–416.
36. Lopez RM, McMahan S (2007) College women’s perception and knowledge of human papillomavirus (HPV) and cervical cancer. *Californian Journal of Health Promotion* 5: 12–25.
37. Cates JR, Brewer NT, Fazekas KI, Mitchell CE, Smith JS (2009) Racial differences in HPV knowledge, HPV vaccine acceptability, and related beliefs among rural, southern women. *J Rural Health* 25: 93–97.
38. Hoque ME (2013) Awareness of cervical cancer, Papanicolaou’s smear and its utilization among female, final year undergraduates in Durban, South Africa. *J Cancer Res Ther* 9: 25–28.
39. Hsu YY, Cheng YM, Hsu KF, Fetzter SJ, Chou CY (2011) Knowledge and beliefs about cervical cancer and human papillomavirus among Taiwanese undergraduate women. *Oncol Nurs Forum* 38: E297–304.
40. Bingham A, Drake JK, LaMontagne DS (2009) Sociocultural issues in the introduction of human papillomavirus vaccine in low-resource settings. *Arch Pediatr Adolesc Med* 163: 455–461.
41. Joy T, Sathian B, Bhattarai C, Chacko J (2011) Awareness of cervix cancer risk factors in educated youth: a cross-sectional, questionnaire based survey in India, Nepal, and Sri Lanka. *Asian Pac J Cancer Prev* 12: 1707–1712.
42. Uzunlar O, Ozyer S, Baser E, Togrul C, Karaca M, et al. (2013) A survey on human papillomavirus awareness and acceptance of vaccination among nursing students in a tertiary hospital in Ankara, Turkey. *Vaccine* 31: 2191–2195.
43. Kamzol W, Jaglarz K, Tomaszewski KA, Puskulluoglu M, Krzemieniecki K (2013) Assessment of knowledge about cervical cancer and its prevention among female students aged 17–26 years. *Eur J Obstet Gynecol Reprod Biol* 166: 196–203.
44. Donadiki EM, Jimenez-Garcia R, Hernandez-Barrera V, Carrasco-Garrido P, Lopez-de Andres A, et al. (2012) Knowledge of the HPV vaccine and its association with vaccine uptake among female higher-education students in Greece. *Hum Vaccin Immunother* 9.
45. Pitts MK, Heywood W, Ryall R, Smith AM, Shelley JM, et al. (2010) Knowledge of human papillomavirus (HPV) and the HPV vaccine in a national sample of Australian men and women. *Sex Health* 7: 299–303.
46. Nnodu O, Erinoshio L, Jamda M, Olaniyi O, Adelaiye R, et al. (2010) Knowledge and attitudes towards cervical cancer and human papillomavirus: a Nigerian pilot study. *Afr J Reprod Health* 14: 95–108.
47. Gottvall M, Larsson M, Hoglund AT, Tyden T (2009) High HPV vaccine acceptance despite low awareness among Swedish upper secondary school students. *Eur J Contracept Reprod Health Care* 14: 399–405.
48. Pelucchi C, Esposito S, Galeone C, Semino M, Sabatini C, et al. (2010) Knowledge of human papillomavirus infection and its prevention among adolescents and parents in the greater Milan area, Northern Italy. *BMC Public Health* 10: 378.
49. Oh JK, Lim MK, Yun EH, Lee EH, Shin HR (2010) Awareness of and attitude towards human papillomavirus infection and vaccination for cervical cancer prevention among adult males and females in Korea: a nationwide interview survey. *Vaccine* 28: 1854–1860.
50. Dinh TA, Rosenthal SL, Doan ED, Trang T, Pham VH, et al. (2007) Attitudes of mothers in Da Nang, Vietnam toward a human papillomavirus vaccine. *J Adolesc Health* 40: 559–563.
51. Lee PW, Kwan TT, Tam KF, Chan KK, Young PM, et al. (2007) Beliefs about cervical cancer and human papillomavirus (HPV) and acceptability of HPV vaccination among Chinese women in Hong Kong. *Prev Med* 45: 130–134.
52. Li J, Li LK, Ma JF, Wei LH, Niyazi M, et al. (2009) Knowledge and attitudes about human papillomavirus (HPV) and HPV vaccines among women living in metropolitan and rural regions of China. *Vaccine* 27: 1210–1215.
53. Lambert EC (2001) College students’ knowledge of human papillomavirus and effectiveness of a brief educational intervention. *J Am Board Fam Pract* 14: 178–183.
54. Ralston JD, Taylor VM, Yasui Y, Kuniyuki A, Jackson JC, et al. (2003) Knowledge of cervical cancer risk factors among Chinese immigrants in Seattle. *J Community Health* 28: 41–57.
55. Wong LP, Wong YL, Low WY, Khoo EM, Shuib R (2009) Knowledge and awareness of cervical cancer and screening among Malaysian women who have never had a Pap smear: a qualitative study. *Singapore Med J* 50: 49–53.
56. Dell DL, Chen H, Ahmad F, Stewart DE (2000) Knowledge about human papillomavirus among adolescents. *Obstet Gynecol* 96: 653–656.
57. Marlow LA, Waller J, Wardle J (2007) Parental attitudes to pre-pubertal HPV vaccination. *Vaccine* 25: 1945–1952.
58. Tiro JA, Saraiya M, Jain N, Liddon N, Cokkinides V, et al. (2008) Human papillomavirus and cervical cancer behavioral surveillance in the US. *Cancer* 113: 3013–3030.
59. Pitts MK, Dyson SJ, Rosenthal DA, Garland SM (2007) Knowledge and awareness of human papillomavirus (HPV): attitudes towards HPV vaccination among a representative sample of women in Victoria, Australia. *Sex Health* 4: 177–180.
60. Dempsey AF, Zimet GD, Davis RL, Koutsky L (2006) Factors that are associated with parental acceptance of human papillomavirus vaccines: a

- randomized intervention study of written information about HPV. *Pediatrics* 117: 1486–1493.
61. Di Giuseppe G, Abbate R, Liguori G, Albano L, Angelillo IF (2008) Human papillomavirus and vaccination: knowledge, attitudes, and behavioural intention in adolescents and young women in Italy. *Br J Cancer* 99: 225–229.
  62. Kahn JA, Rosenthal SL, Jin Y, Huang B, Namakydoust A, et al. (2008) Rates of human papillomavirus vaccination, attitudes about vaccination, and human papillomavirus prevalence in young women. *Obstet Gynecol* 111: 1103–1110.
  63. Walsh CD, Gera A, Shah M, Sharma A, Powell JE, et al. (2008) Public knowledge and attitudes towards Human Papilloma Virus (HPV) vaccination. *BMC Public Health* 8: 368.
  64. Chelimo C, Wouldes TA, Cameron LD (2010) Human papillomavirus (HPV) vaccine acceptance and perceived effectiveness, and HPV infection concern among young New Zealand university students. *Sex Health* 7: 394–396.
  65. Hoover DR, Carlioli B, Moench EA (2000) Attitudes of adolescent/young adult women toward human papillomavirus vaccination and clinical trials. *Health Care Women Int* 21: 375–391.
  66. Brabin L, Roberts SA, Farzaneh F, Kitchener HC (2006) Future acceptance of adolescent human papillomavirus vaccination: a survey of parental attitudes. *Vaccine* 24: 3087–3094.
  67. Constantine NA, Jerman P (2007) Acceptance of human papillomavirus vaccination among Californian parents of daughters: a representative statewide analysis. *J Adolesc Health* 40: 108–115.
  68. Fazekas KI, Brewer NT, Smith JS (2008) HPV vaccine acceptability in a rural Southern area. *J Womens Health (Larchmt)* 17: 539–548.
  69. Morison LA, Cozzolino PJ, Orbell S (2010) Temporal perspective and parental intention to accept the human papillomavirus vaccination for their daughter. *Br J Health Psychol* 15: 151–165.
  70. Conroy K, Rosenthal SL, Zimet GD, Jin Y, Bernstein DI, et al. (2009) Human papillomavirus vaccine uptake, predictors of vaccination, and self-reported barriers to vaccination. *J Womens Health (Larchmt)* 18: 1679–1686.
